# Supplementary material
Source: PubMed Central journal article supplement (PMC6663311)
Supplement: NIHMS1020429-supplement-Supplemental_Material.pdf [file NIHMS1020429-supplement-Supplemental_Material.pdf]

Supplemental Table 1

*Items Comprising Parcels Used as Indicators in the Structural Equation Models*

| Parcels                             | Item numbers                                                 |
|-------------------------------------|--------------------------------------------------------------|
| Problem-solving skills <sup>a</sup> |                                                              |
| Parcel 1                            | 11, 20, 29, 39, 40, 43, 46                                   |
| Parcel 2                            | 24, 27, 33, 37, 44, 47, 48                                   |
| Parcel 3                            | 5, 18, 25, 26, 35, 49                                        |
| Negative urgency <sup>b</sup>       |                                                              |
| Parcel 1                            | 2, 7, 17, 29                                                 |
| Parcel 2                            | 12, 22, 39, 44                                               |
| Parcel 3                            | 34, 51, 54, 58                                               |
| Depression <sup>c</sup>             |                                                              |
| Parcel 1                            | 1, 4, 5, 6, 12, 13, 18                                       |
| Parcel 2                            | 7, 8, 10, 11, 14, 15, 20                                     |
| Parcel 3                            | 2, 3, 16, 17, 19, 21                                         |
| Alcohol problems <sup>d</sup>       |                                                              |
| Parcel 1                            | 1, 3, 5, 8, 11, 12, 18, 20, 21, 23, 25, 28, 30, 34, 36, 48   |
| Parcel 2                            | 4, 6, 7, 10, 13, 22, 24, 32, 35, 37, 38, 39, 43, 44, 46, 47  |
| Parcel 3                            | 2, 9, 14, 15, 16, 17, 19, 26, 27, 29, 31, 33, 40, 41, 42, 45 |

<sup>a</sup>Problem-solving skills was measured using the Social Problem-Solving Inventory-Revised's rational problem solving subscale (D'Zurilla et al., 2002).

<sup>b</sup>Negative urgency was measured using the UPPS-P Impulsive Behavior Scale's negative urgency subscale (Lynam, Smith, Whiteside, & Cyders, 2006).

<sup>c</sup>Depression was measured using the Beck Depression Inventory-II (Beck, Steer, & Brown, 1996). The suicidal ideation item was omitted from the parcels to avoid a confound with the suicidal ideation latent variable.

<sup>d</sup>Alcohol problems was measured using the Young Adult Alcohol Consequences Questionnaire (Read, Kahler, Strong, & Colder, 2006).
